# Supplementary material for: Validation of a polygenic risk score for frailty in the Lothian Birth Cohort 1936 and English longitudinal study of ageing
Source: PubMed Central journal article supplement (PMC11143351; doi:10.1038/s41598-024-63229-y), 2024-06-01
Supplement: 41598_2024_63229_MOESM4_ESM.pdf [file 41598_2024_63229_MOESM4_ESM.pdf]

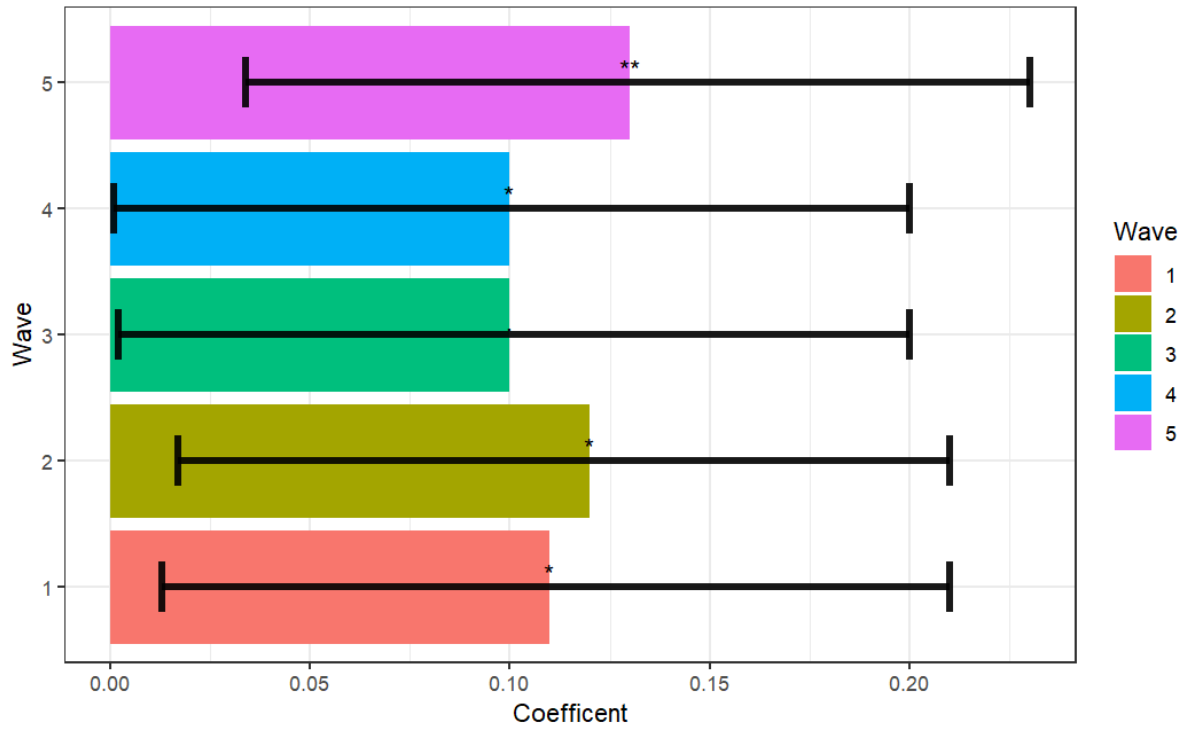

Figure S3. A bar plot comparing the standardized coefficients from the 5 waves on the same sample of all 402 participants in LBC1936.
